# Supplementary material for: PI3Kδ inhibition causes feedback activation of PI3Kα in the ABC subtype of diffuse large B-cell lymphoma
Source: PubMed Central journal article supplement (PMC5669848; doi:10.18632/oncotarget.20864), 2017-09-13
Supplement: oncotarget-08-81794-s001.pdf [file oncotarget-08-81794-s001.pdf]

## PI3K $\delta$ inhibition causes feedback activation of PI3K $\alpha$ in the ABC subtype of diffuse large B-cell lymphoma

### SUPPLEMENTARY MATERIALS

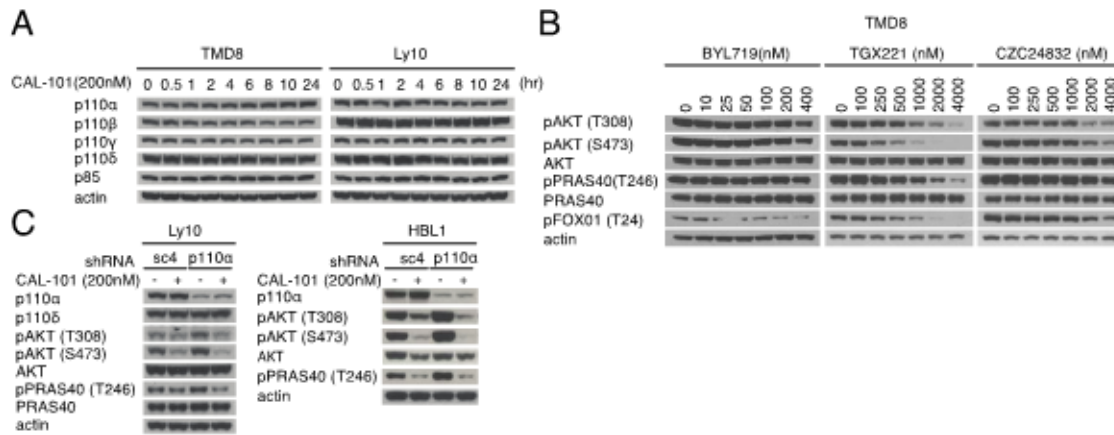

**Supplementary Figure 1: Compensatory role of PI3K $\alpha$  in ABC DLBCL subgroup.** (A) TMD8 and LY10 were exposed over different time periods to CAL-101. Immunoblot indicates that PI3K $\alpha$  expression increases over time in TMD8 but not Ly10 cells. (B) TMD8 cells were treated with different concentrations of BYL719 (PI3K $\alpha$ ), TGX221 (PI3K $\beta$ ) and CZC24832 (PI3K $\gamma$ ). Immunoblot indicates the PI3K activity after 2hrs of drug treatment. (C) Ly10 and HBL1 cells were transduced with sc4 (control) or PI3K $\alpha$ -targeted shRNA for 24hr, followed by 24hr CAL-101 treatment. Results indicate that the knock-down of PI3K $\alpha$  prolongs the PI3K inhibition of CAL-101 without decreasing the baseline PI3K activity.

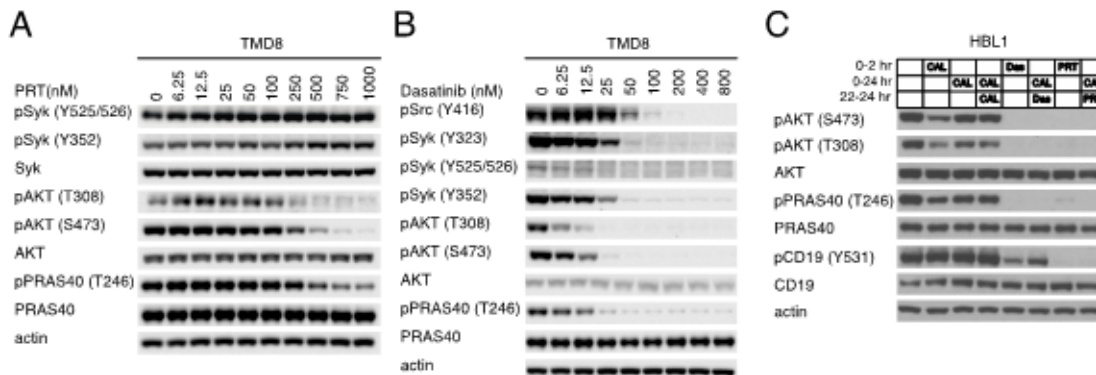

**Supplementary Figure 2: Feedback activation of PI3K $\alpha$  following PI3K $\delta$  inhibition is mediated through increased BCR signaling.** (A) TMD8 were treated with PRT062607 at the indicated concentrations for 2hrs. Immunoblot indicates complete inhibition of pAKT-473 and pAKT-308 at 1000nM. (B) TMD8 cells were treated with dasatinib at the indicated concentrations for 2hrs. Immunoblot indicates complete inhibition of pAKT-473 and pAKT-308 at 50nM. (C) HBL1 were treated with 200nM CAL-101, 50nM dasatinib (src inhibitor), 1000nM PRT062607 (Syk inhibitor) at the indicated time points and harvested at 2hr and 24hr. Results indicate that rebound PI3K reactivation following PI3K $\delta$  inhibition is sensitive to Src and Syk inhibition.
